# Supplementary material for: Psycheutopia: an innovative educational program to enhance mental health literacy among medical students
Source: Frontiers journal article supplement (doi:10.3389/fpsyt.2025.1538476), 2025-03-27
Supplement: Presentation_3.pdf [file Presentation_3.pdf]

## **Supplementary Materials C - the Psychometric Properties of the Questionnaires:**

### **Mental Health Literacy Scale (MHLS):**

MHLS is a questionnaire that measures the main domains of mental health literacy in five subscales including Knowledge about mental illness; Knowledge about confidentiality of information; Access to information; Knowledge about mental illness treatment; and stigma(1). The Persian version consists of twenty-three items and is valid and reliable with Cronbach's alpha of 0.873 (2) and the total score ranges from 23 to 106. Higher scores indicate better mental health literacy.

### **Mental Health-Promoting Knowledge (MHPK):**

MHPK is a 10-item questionnaire that evaluates positive mental health literacy which is a person's awareness of how to achieve and maintain appropriate mental health(3). Each item is rated on a Likert scale (e.g., 1 = strongly disagree, 4 = strongly agree), resulting in a total score range of 10 to 40. Higher scores reflect greater knowledge about mental health promotion. The Persian version is valid and reliable with Cronbach's alpha of 0.81 (4).

### **World Health Organization (WHO)-5 Well-being Index:**

The WHO-5 questionnaire consists of five questions and evaluates individuals' subjective well-being. It contains five questions, and each item is scored on a Likert scale from 0 to 5. The raw scores are summed (0-25) and then transformed to a scale of 0 to 100. A transformed score of  $\leq 50$  is commonly used as a cutoff to indicate potential depression and may warrant further assessment. Higher scores indicate better well-being. The Persian version is a valid and reliable questionnaire with Cronbach's alpha of 0.89 to 0.91 (5-7).

## References:

1. O'Connor M, Casey L. The Mental Health Literacy Scale (MHLS): A new scale-based measure of mental health literacy. *Psychiatry research*. 2015;229(1-2):511-6.
2. Ghaedamini Harouni G, Sajjadi H, Forouzan AS, Ahmadi S, Ghafari M, Vameghi M. Validation of the Persian version of the mental health literacy scale in Iran. *Asia-Pacific Psychiatry*. 2022;14(1):e12447.
3. Bjørnsen HN, Eilertsen MEB, Ringdal R, Espnes GA, Moksnes UK. Positive mental health literacy: development and validation of a measure among Norwegian adolescents. *BMC public health*. 2017;17:1-10.
4. Mahmoodi MH, Ahmadzad-Asl M, Rasoulia M. Mental health positive knowledge questionnaire: translation and cultural adaptation and psychometric properties. *Social Welfare Quarterly*. 2021;21(82):245-73.
5. Topp CW, Østergaard SD, Søndergaard S, Bech P. The WHO-5 Well-Being Index: a systematic review of the literature. *Psychotherapy and psychosomatics*. 2015;84(3):167-76.
6. Dehshiri G, Mousavi S. An investigation into psychometric properties of Persian version of World Health Organization Five Well-Being Index. *Journal of clinical psychology*. 2016;8(2):67-75.
7. Dadfar M, Momeni Safarabad N, Asgharnejad Farid AA, Nemati Shirzy M, Ghazie pour Abarghouie F. Reliability, validity, and factorial structure of the World Health Organization-5 Well-Being Index (WHO-5) in Iranian psychiatric outpatients. *Trends in psychiatry and psychotherapy*. 2018;40:79-84.
